# Supplementary material
Source: publisher figshare collection journal article supplement (https://acs.figshare.com/ndownloader/files/4583983)
Supplement: Supplementary file 1 [file 4583983]

# The Effects of Substrate Phonon Mode Scattering on Transport in Carbon Nanotubes

Vasili Perebeinos<sup>1</sup>, Slava Rotkin<sup>2</sup>, Alexey G. Petrov<sup>3</sup>, and Phaedon Avouris<sup>1</sup>

<sup>1</sup>IBM Research Division, T. J. Watson Research Center,  
Yorktown Heights, New York 10598

<sup>2</sup>Physics Department, Lehigh University, 16 Memorial Dr. E., Bethlehem, PA 18015  
Center for Advanced Materials and Nanotechnology,  
Lehigh University, 5 E. Packer Ave., Bethlehem, PA 18015

<sup>3</sup>Ioffe Institute, 26 Polytekhnicheskaya, St. Petersburg, 194021, Russia

## Supporting Information

Here we report calculations of the low-field mobility temperature dependence and diameter dependence at room temperature in the presence of the CNT phonon scattering only. The mobility shows a single maximum as a function of density for the Fermi level below the bottom of the second band [1]. The temperature dependence of the peak mobility in (19,0) tube is shown in Fig. 1 and the corresponding density where the peak occurs in Fig. 2. The diameter dependence of the peak mobility at room temperature is shown in Fig. 3 and the corresponding diameter dependence of the carrier density where the peak occurs are shown in Fig. 4.

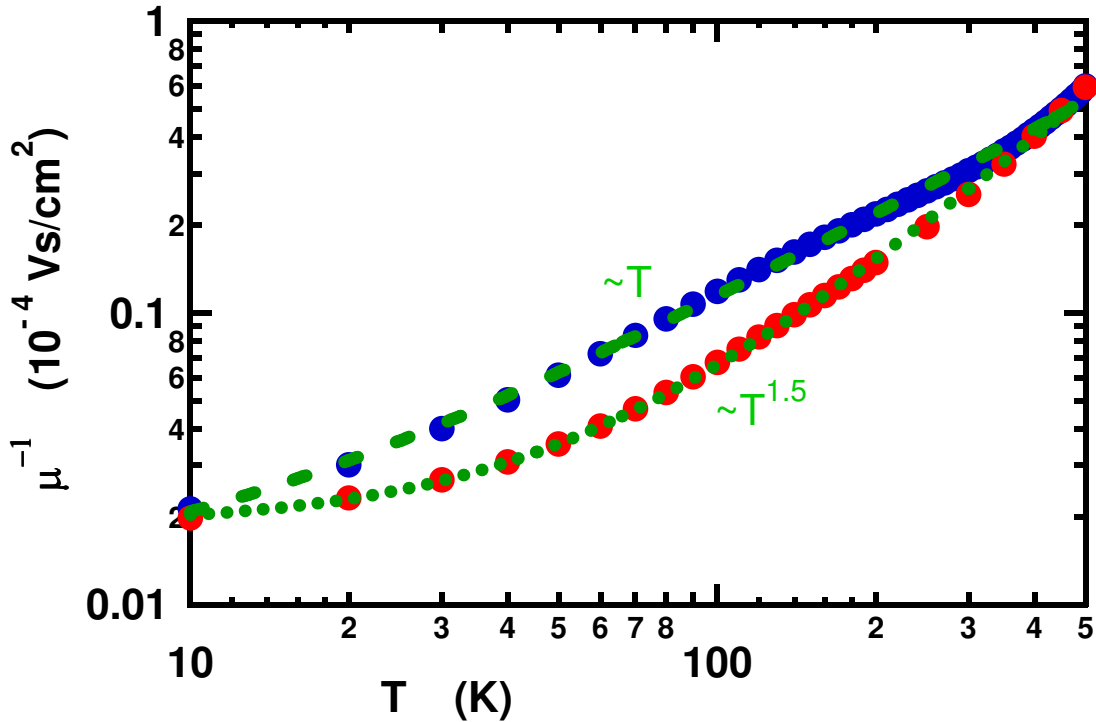

**Fig. 1.** Low-field inverse mobility as a function of temperature in (19, 0) tube at low density (blue circles) and the peak mobility at finite density (red circles). The dashed line

is a linear fit  $\mu^{-1}=0.01+0.001 T$  to the low density limit inverse mobility and dotted curve is a power law fit  $\mu^{-1}=0.019+0.00048 T^{1.5}$  to the maximum mobility at finite density.

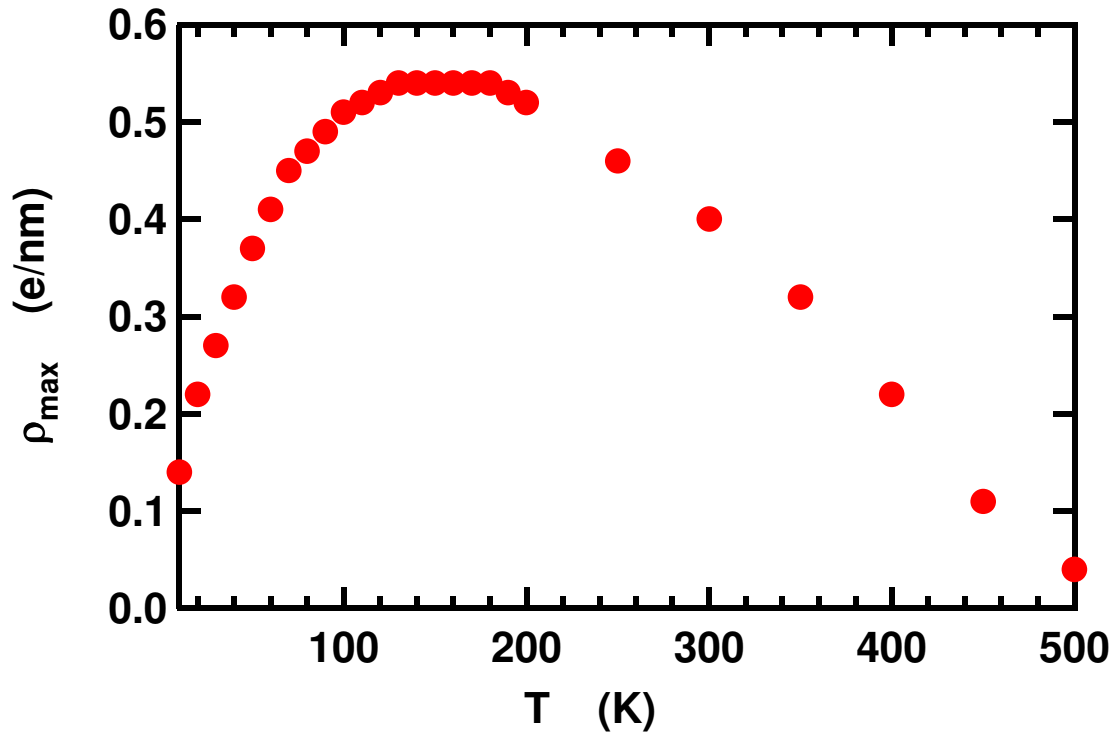

**Fig. 2.** Temperature dependence of the density at which low-field mobility is maximum in (19, 0) tube.

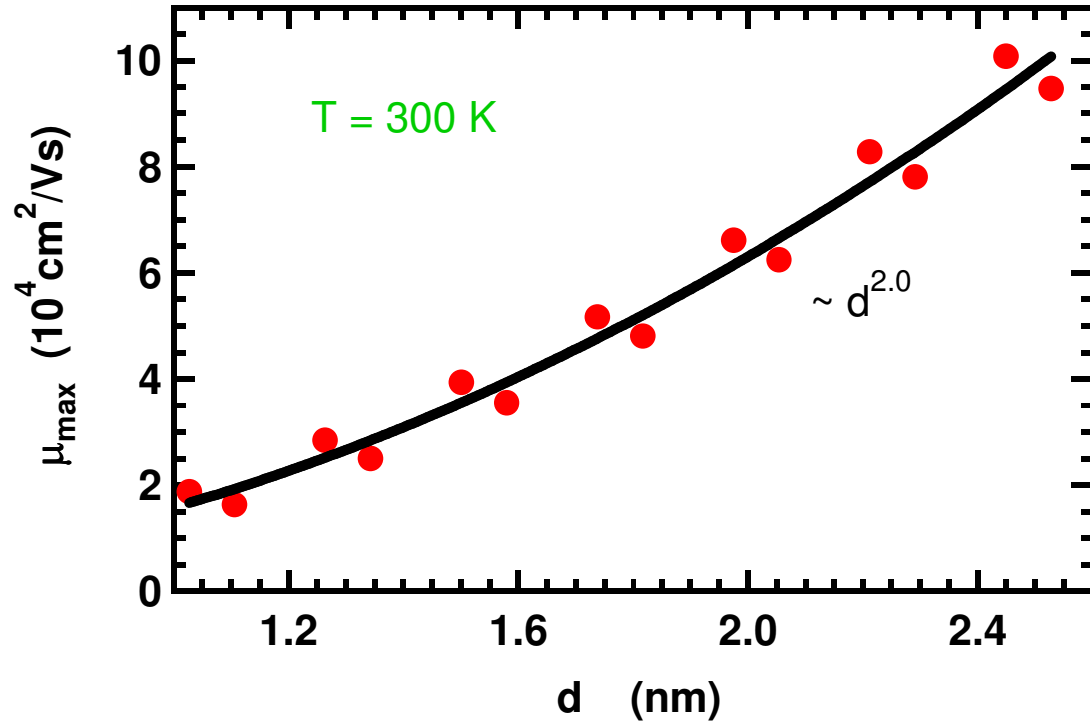

**Fig. 3.** Diameter dependence of the peak mobility in zig-zag tubes at room temperature. The black solid curve is a fit  $\mu_{\max}=1.6 d^2$ .

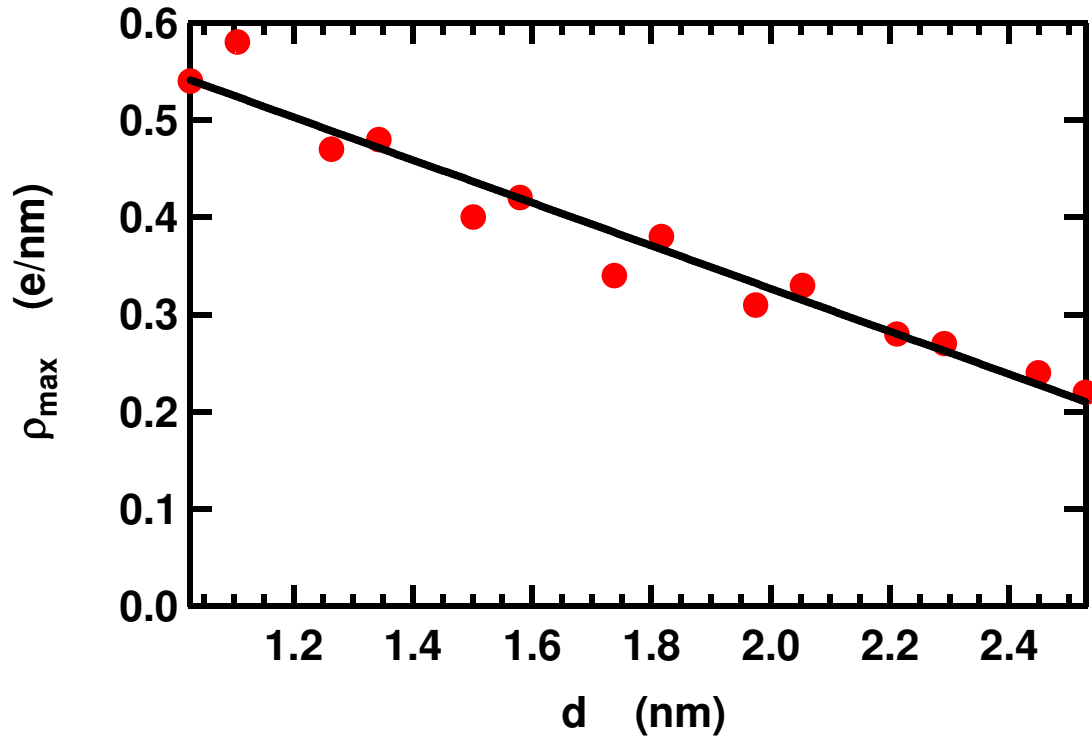

**Fig. 4.** Diameter dependence of the density at which mobility is maximum in zig-zag tubes at room temperature. The black solid curve is a linear fit  $\rho_{\max}=0.77 -0.22d$ .

## References

- [1] Perebeinos, V.; Tersoff, J.; Avouris, Ph. *Nano Lett.* **2006**, 6, 205.
